# Supplementary material for: Clonal hematopoiesis in primary immune thrombocytopenia
Source: PubMed Central journal article supplement (PMC8924250; doi:10.1038/s41408-022-00641-5), 2022-03-15
Supplement: 41408_2022_641_MOESM1_ESM.pdf [file 41408_2022_641_MOESM1_ESM.pdf]

**Clonal Hematopoiesis in Primary Immune Thrombocytopenia**  
***CH in ITP***

**Supplemental table 1. 38 targeted genes and the sequencing range**

| <b>Gene name</b> | <b>Chromosome</b> | <b>Transcription ID</b> | <b>Detection range(including splicing site)</b> |
|------------------|-------------------|-------------------------|-------------------------------------------------|
| ASXL1            | 20q11             | NM_015338.5             | Exon1-13                                        |
| BCOR             | Xp11.4            | NM_029510.3             | Exon2-15                                        |
| BCORL1           | Xq26.1            | NM_178782.4             | Exon1-12                                        |
| CALR             | 19p13.13          | NM_004343.3             | Exon9                                           |
| CBL              | 11q23.3           | NM_005188.3             | Exon8-9                                         |
| CEBPA            | 19q13.1           | NM_004364.4             | Exon1                                           |
| CSF3R            | 1p34.3            | NM_004364.4             | Exon14,17                                       |
| DNMT3A           | 2p23              | NM_022552.4             | Exon13-23                                       |
| ETV6             | 12p13             | NM_001987.4             | Exon1-8                                         |
| EZH2             | 7q36.1            | NM_004456.4             | Exon2-20                                        |
| FLT3             | 13q12             | NM_004119.2             | Exon14,15,20                                    |
| GATA2            | 3q21.3            | NM_032638.4             | Exon2-6                                         |
| IDH1             | 2q33.3            | NM_005896.3             | Exon4 c.298_414                                 |
| IDH2             | 15q26.1           | NM_002168.3             | Exon4                                           |
| JAK2             | 9p24              | NM_004972.3             | Exon12,14,16                                    |
| KIT              | 4q12              | NM_000222.2             | Exon14,18,19                                    |
| KRAS             | 12p12.1           | NM_033360.3             | Exon2                                           |
| MLL              | 11q23             | NM_118540.3             | Exon3,7,27                                      |
| MPL              | 1p34              | NM_005373.2             | Exon 10                                         |
| NPM1             | 5q35.1            | NM_002520.6             | Exon 11                                         |
| NRAS             | 1p13.2            | NM_002524.4             | Exon 2-3                                        |
| PDGFRA           | 4q12              | NM_006206.6             | Exon14                                          |
| PHF6             | Xq26.3            | NM_032458.2             | Exon 2-10                                       |
| PIGA             | Xp22.2            | NM_011081.3             | Exon1-6                                         |
| RUNX1            | 21q22.3           | NM_001754.4             | Exon 2-9                                        |
| SETBP1           | 18q21.1           | NM_015559.2             | Exon4 c.2453_2682                               |
| SF3B1            | 2q33.1            | NM_012433.2             | Exon 14-16                                      |
| SH2B3            | 12q24             | NM_005475.2             | Exon2 c.557_732                                 |
| SRSF2            | 17q25.1           | NM_003016.4             | Exon1 c.266_362                                 |
| TET2             | 4q24              | NM_001127208.2          | Exon 3-11                                       |
| TP53             | 17p13.1           | NM_000546.5             | Exon 3-11                                       |
| U2AF1            | 21q22.3           | NM_006758.2             | Exon 2, 6,7,8                                   |
| WT1              | 11p13             | NM_024426.4             | Exon 7-9                                        |
| ZRSR2            | Xp22.2            | NM_009453.3             | Exon7                                           |
| NF1              | 17q11.2           | NM_010897.2             | Exon29,33                                       |
| STAG2            | Xq25              | NM_021465.4             | Exon12,28                                       |
| STAT3            | 17q21.2           | NM_011486.5             | Exon21                                          |
| PPM1D            | 17q23.2           | NM_003620.4             | Exon1                                           |

**Supplemental table 2. Details for the detected mutations in 14 ITP patients**

| Pt.ID  | Ensembl gene       | Gene   | Mutation                       | AA change     | Transcript             | COSMIC           | VAF    |
|--------|--------------------|--------|--------------------------------|---------------|------------------------|------------------|--------|
| ITP 1  | ENSG00000119772.16 | DNMT3A | 23:c.G264<br>5A                | R882H         | ENST00000<br>264709.7  | COSV530<br>36153 | 0.0466 |
| ITP2   | ENSG00000171456.17 | ASXL1  | 12:c.1900<br>_1922del          | E635fs        | ENST00000<br>375687.9  | COSG655<br>03    | 0.0539 |
| ITP 3  | ENSG00000119772.16 | DNMT3A | 23:c.G264<br>5A                | R882H         | ENST00000<br>264709.7  | COSV530<br>36153 | 0.0454 |
| ITP 4  | ENSG00000119772.16 | DNMT3A | 13:c.1516<br>_1517insG<br>GGGT | H506fs        | ENST00000<br>264709.7  | COSV530<br>36153 | 0.0692 |
| ITP 5  | ENSG00000141510.17 | TP53   | 7:c.C742T                      | R248W         | ENST00000<br>617185    | COSV526<br>62035 | 0.0739 |
| ITP 6  | ENSG00000161547.16 | SRSF2  | 1:c.284_2<br>98del             | 95_100<br>del | ENST00000<br>392485.2  | COSG661<br>0     | 0.0588 |
| ITP 7  | ENSG00000171456.17 | ASXL1  | 12:c.1927<br>dupG              | G642fs        | ENST00000<br>375687.9  | COSG497<br>249   | 0.0945 |
| ITP 8  | ENSG00000119772.16 | DNMT3A | 19:c.C220<br>6T                | R736C         | ENST00000<br>264709.7  | COSV530<br>38112 | 0.0290 |
| ITP 9  | ENSG00000168769.13 | TET2   | 3:c.1065d<br>upT               | G355fs        | ENST00000<br>380013.8  | COSG772<br>98    | 0.0625 |
| ITP 10 | ENSG00000119772.16 | DNMT3A | 15:c.C179<br>2T                | R598*         | ENST00000<br>264709.7  | COSV530<br>39812 | 0.0313 |
| ITP 11 | ENSG00000119772.16 | DNMT3A | 16:c.C190<br>3T                | R635W         | ENST00000<br>264709.7  | COSV530<br>38925 | 0.0540 |
|        | ENSG00000168769.13 | TET2   | 11:c.A560<br>3G                | H1868<br>R    | ENST00000<br>380013.8  | COSG772<br>98    | 0.0580 |
| ITP 12 | ENSG00000245848.3  | CEBPA  | 1:c.190del<br>A                | 164fs         | ENST00000<br>498907.3  | COSG6            | 0.0125 |
| ITP 13 | ENSG00000119772.16 | DNMT3A | 19:c.T219<br>5C                | F732S         | ENST00000<br>264709.7  | COSV53<br>048945 | 0.0171 |
| ITP 14 | ENSG00000115524.15 | SF3B1  | 15:c.A209<br>8G                | K700E         | ENST00000<br>335508.10 | COSG685<br>61    | 0.0129 |

All annotations and genomic coordinates were based on the Genome Reference Consortium Human Genome Build 38 (GRCh38) reference genome. The mutations were shown in HGVS format. The canonical transcript or for the transcript that had harmful foreboding for the protein structure was revealed in the amino-acid change (AA change). The transcripts with the longest CCDS translation were canonical transcripts. The amino-acid changes were also included in the table.

Abbreviations: Pt. ID, patient identifier; ITP, primary immune thrombocytopenia; AA, amino acid; VAF, variant allele frequency.

**Supplemental table 3. Clinical characteristics of 102 ITP patients**

|                            | Count (n) | Percentage (%) | CH (n) | No CH (n) | <i>P</i> value |
|----------------------------|-----------|----------------|--------|-----------|----------------|
| <b>Gender</b>              |           |                |        |           |                |
| female                     | 56        | 54.9           | 6      | 50        | 0.999          |
| male                       | 46        | 45.1           | 5      | 41        |                |
| <b>Autoantibody</b>        |           |                |        |           |                |
| positive                   | 24        | 23.5           | 3      | 21        | 0.999          |
| negative                   | 78        | 76.5           | 8      | 70        |                |
| <b>Smoking</b>             |           |                |        |           |                |
| smoker                     | 30        | 28.4           | 4      | 26        | 0.792          |
| non-smoker                 | 72        | 71.6           | 7      | 65        |                |
| <b>Hypertension</b>        |           |                |        |           |                |
| yes                        | 20        | 19.6           | 1      | 19        | 0.413          |
| no                         | 82        | 80.4           | 10     | 72        |                |
| <b>Diabetes</b>            |           |                |        |           |                |
| yes                        | 17        | 16.7           | 1      | 16        | 0.543          |
| no                         | 85        | 83.3           | 10     | 75        |                |
| <b>CHD</b>                 |           |                |        |           |                |
| yes                        | 9         | 8.8            | 2      | 7         | 0.687          |
| no                         | 93        | 91.2           | 9      | 84        |                |
| <b>Cerebral infarction</b> |           |                |        |           |                |
| yes                        | 6         | 5.9            | 1      | 5         | 0.567          |
| no                         | 96        | 94.1           | 10     | 86        |                |

Binary-logistic regression was used to analyze the correlation between various risk factors and the incidence of CH. There was no significant association between CH and gender, smoking, existence of anti-glycoprotein (GP) autoantibody (GPIIb/IIIa or GPIb/IX), hypertension, diabetes, coronary heart disease, or cerebral infarction in ITP patients.

Abbreviations: CH, clonal hematopoiesis; CHD, coronary heart disease.

**Supplemental table 4. Blood cell indices of 102 ITP patients**

|                                                         | <b>CH</b>          | <b>No CH</b>       | <b>P value</b> |
|---------------------------------------------------------|--------------------|--------------------|----------------|
| <b>WBC (<math>\times 10^3/\text{mL}</math>)</b>         | 6.55 $\pm$ 3.13    | 6.95 $\pm$ 2.63    | 0.67           |
| <b>Neutrophils (<math>\times 10^3/\text{mL}</math>)</b> | 4.48 $\pm$ 2.53    | 4.71 $\pm$ 2.46    | 0.79           |
| <b>Lymphocytes (<math>\times 10^3/\text{mL}</math>)</b> | 1.46 $\pm$ 1.03    | 1.68 $\pm$ 0.71    | 0.41           |
| <b>Monocytes (<math>\times 10^3/\text{mL}</math>)</b>   | 0.52 $\pm$ 0.19    | 0.47 $\pm$ 0.24    | 0.55           |
| <b>RBC (<math>\times 10^6/\text{mL}</math>)</b>         | 4.08 $\pm$ 0.92    | 4.28 $\pm$ 0.79    | 0.48           |
| <b>Hemoglobin (g/L)</b>                                 | 122.78 $\pm$ 27.35 | 122.72 $\pm$ 31.95 | 0.99           |
| <b>RDW (%)</b>                                          | 15.07 $\pm$ 2.97   | 13.83 $\pm$ 1.61   | 0.17           |
| <b>MCV (fL)</b>                                         | 93.53 $\pm$ 8.68   | 90.05 $\pm$ 7.11   | 0.25           |
| <b>HCT (%)</b>                                          | 37.78 $\pm$ 7.66   | 38.40 $\pm$ 6.63   | 0.79           |
| <b>Platelet (<math>\times 10^3/\text{mL}</math>)</b>    | 9.82 $\pm$ 7.77    | 18.07 $\pm$ 6.04   | 0.09           |

Data were presented as mean  $\pm$  SD.

Abbreviations: WBC, white blood cell; RBC, red blood cell; RDW, red-cell distribution width; MCV, mean corpuscular volume; HCT, hematocrit.

**Supplemental table 5. Details of the mutations in 24 CH-AA patients**

| Patient ID | Gender | Age (Y) | Gene   | Mutation                   | VAF (%) |
|------------|--------|---------|--------|----------------------------|---------|
| 1          | F      | 50      | MLL    | c. G6632A: p. R2211Q       | 17.17   |
| 2          | F      | 53      | DNMT3A | c. C2311T: p. R771*        | 22.90   |
| 3          | M      | 55      | ASXL1  | c. T2400G: p. D800E        | 19.36   |
| 4          | M      | 62      | TET2   | c. 1836delT: p. P612fs     | 2.59    |
| 5          | F      | 66      | DNMT3A | c. C1554+1G > A            | 3.93    |
| 6          | M      | 49      | DNMT3A | c. T2578C: p. W860R        | 10.37   |
| 7          | M      | 34      | TET2   | c. G2862A: p. W954*        | 4.56    |
| 8          | M      | 71      | U2AF1  | c. C101T: p. S34F          | 10.52   |
| 9          | M      | 57      | ASXL1  | c. 1927dupG: p. G642fs     | 14.29   |
|            |        |         | SETBP1 | c. G2602A: p. P868N        | 7.06    |
| 10         | M      | 38      | BCOR   | c. T1260C: p. D420D        | 5.04    |
| 11         | F      | 81      | U2AF1  | c. C101T: p. S34F          | 3.06    |
| 12         | M      | 86      | DNMT3A | c. 2196delT: p. F732fs     | 21.15   |
| 13         | M      | 43      | ASXL1  | c. C2077T: p. R693*        | 13.78   |
| 14         | M      | 63      | BCOR   | c. G4691 A: p. W1564*      | 8.00    |
|            |        |         | PIGA   | c. G548T: p. C183F         | 9.30    |
| 15         | M      | 65      | STAT3  | c. A1840C: p.S614R         | 4.20    |
|            |        |         | PHF6   | c. A831T: p. R277S         | 3.50    |
| 16         | F      | 73      | SRSF2  | c. C284A: p. P95H          | 3.30    |
| 17         | F      | 42      | SF3B1  | c. A2098G: p. K700E        | 30.24   |
| 18         | F      | 66      | TET2   | c. T2096A: p. L699*        | 10.01   |
| 19         | M      | 66      | ASXL1  | c. 1927_1928del: p. G643fs | 20.13   |
|            |        |         | ETV6   | c. C1032A: p. Y344*        | 20.81   |
| 20         | M      | 64      | TET2   | c. G5541A: p. W1847*       | 24.16   |
| 21         | F      | 27      | PIGA   | c. 172delC: p. Q58S*fs*3   | 5.60    |
| 22         | M      | 52      | BCOR   | c. 472dupA: p. S158Kfs*28  | 23.00   |
| 23         | M      | 53      | ZRSR2  | c. 127dupT: p. S43Ffs*12   | 17.00   |
| 24         | F      | 21      | KMT2D  | c. C1981T : p. R661C       | 4.60    |

**Supplemental table 6. Summary of gene mutations in 55 CH-hMDS patients**

| Gene   | Patient number | Mutations                                                  | Percent in CH patients | Percent in all mutations |
|--------|----------------|------------------------------------------------------------|------------------------|--------------------------|
| DNMT3A | 10             | G > A(1); A > G(3);<br>C > T(1); del(2); dup(2); delins(1) | 18.18%                 | 13.89%                   |
| ASXL1  | 10             | del(3); dup(4); C > T(2); C > A(1)                         | 18.18%                 | 13.89%                   |
| SF3B1  | 10             | G > A(1); T > G(1); A > G(6); C > T(2)                     | 18.18%                 | 13.89%                   |
| U2AF1  | 6              | C > T(3); C > A(2); A > G(1)                               | 10.91%                 | 8.33%                    |
| TET2   | 5              | del(3); dup(1); A > G(1)                                   | 9.09%                  | 6.94%                    |
| TP53   | 4              | C > A(1); G > A(2); T > C(1)                               | 7.27%                  | 5.56%                    |
| IDH2   | 3              | G > A(3)                                                   | 5.45%                  | 4.17%                    |
| RUNX1  | 3              | del(1); dup(1); T > A(1)                                   | 5.45%                  | 4.17%                    |
| SETBP1 | 3              | G > A(3)                                                   | 5.45%                  | 4.17%                    |
| SRSF2  | 2              | c. C283G: p. P95A<br>c. C284G: p. P95L                     | 3.64%                  | 2.78%                    |
| WT1    | 2              | c. 297_298del: p. P100fs<br>c. 593_597dup: p. M200fs       | 3.64%                  | 2.78%                    |
| STAT3  | 2              | c.G1981T: p. D661Y<br>c. C1842G: p. S614R                  | 3.64%                  | 2.78%                    |
| ETV6   | 2              | c. 306delT: p. R103fs<br>c. 145delC: p. R49fs              | 3.64%                  | 2.78%                    |
| STAG2  | 2              | c. C646T: p. R216*<br>c. A3025G: p. K1009E                 | 3.64%                  | 2.78%                    |
| NPM1   | 1              | c. 859_860insTCTG: p. L287fs                               | 1.82%                  | 1.39%                    |
| ZRSR2  | 1              | c. 827+1G > A                                              | 1.82%                  | 1.39%                    |
| PPM1D  | 1              | c. C1654T: p. R552*                                        | 1.82%                  | 1.39%                    |
| PHF6   | 1              | c. 27dupA: p. G10fs                                        | 1.82%                  | 1.39%                    |
| NRAS   | 1              | c. 31_35delinsCGGGA:<br>p. A11_G12delinsRD                 | 1.82%                  | 1.39%                    |
| NF1    | 1              | c. 2033dupG: p. I679fs                                     | 1.82%                  | 1.39%                    |
| NPM1   | 1              | c. 859_860insTCTG: p. L287fs                               | 1.82%                  | 1.39%                    |
| CBL    | 1              | c. C1019A: p. P340H                                        | 1.82%                  | 1.39%                    |
| IDH1   | 1              | c. G395A: p. R132H                                         | 1.82%                  | 1.39%                    |
| BCOR   | 1              | c. 932delA: p. K311fs                                      | 1.82%                  | 1.39%                    |
| EZH2   | 1              | c. 1217_1220del: p. K406fs                                 | 1.82%                  | 1.39%                    |

In the “mutations” column, the number in parentheses represents the number of patients with this type of mutations. The symbol “>” means base substitution.

Abbreviations: dup, duplication; del, deletion; delins, deletion-insertion.
